# Supplementary figures and images for: Memory Impairment Related to NLRP3 Inflammasome Activation and TRPC5 Decrease in Hippocampal Excitatory Synapses in Microglia Knockout IL-10 Mice
Source: Research Square preprint supplement (doi:10.21203/rs.3.rs-350651/v1), 2021-03-30

Table 1: Antibodies


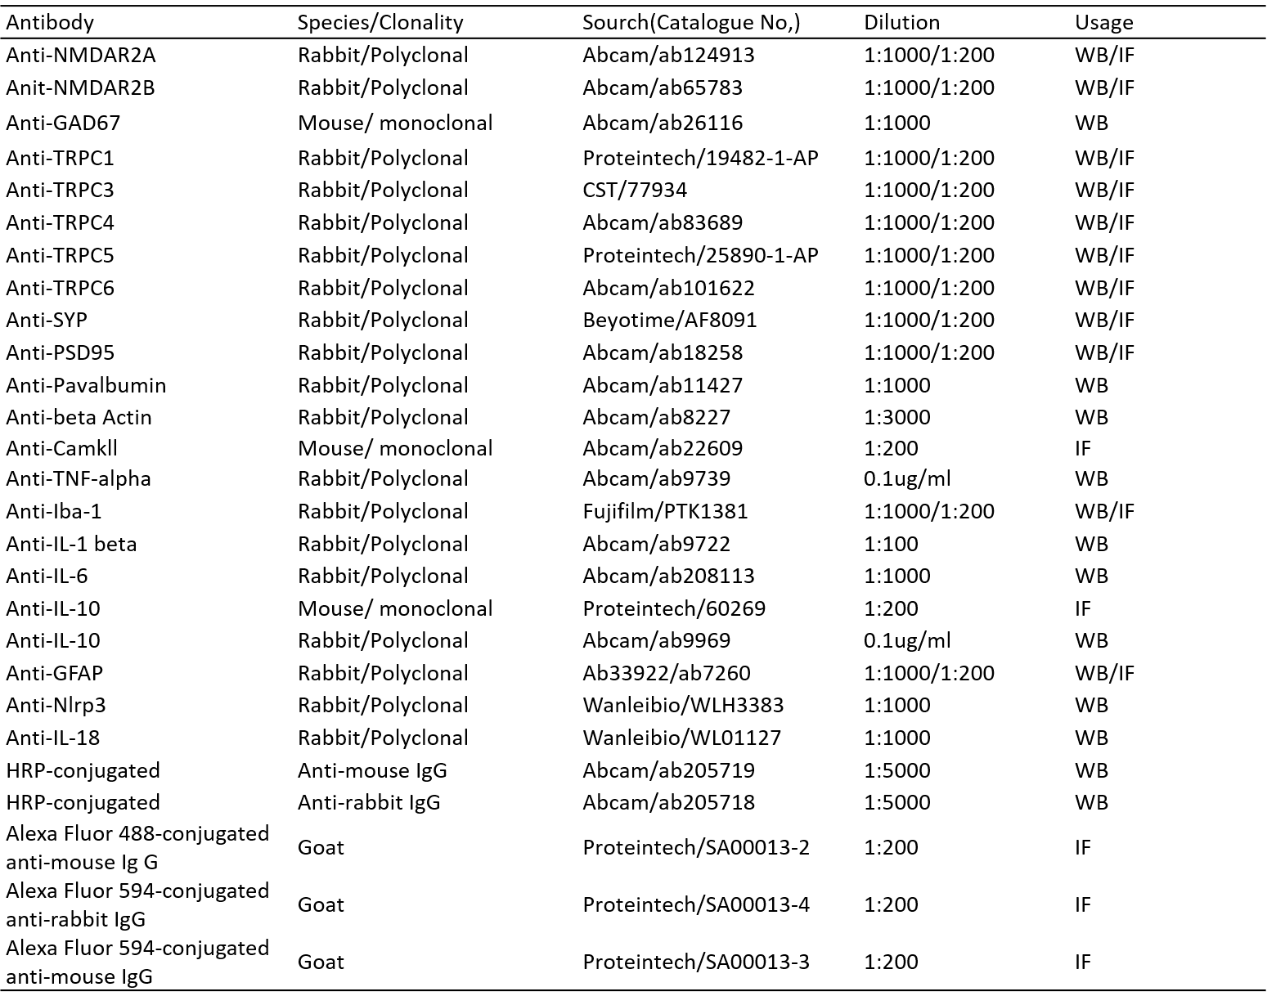

Supplement: Supplementary file 1 [file c09e8d7745fd844dbdcdccff.docx]
